# Supplementary material for: MicroRNA-216a-3p promotes sorafenib sensitivity in hepatocellular carcinoma by downregulating MAPK14 expression
Source: publisher site journal article supplement (doi:10.18632/aging.103670), 2020-09-21
Supplement: Supplementary file [file aging-v12i18-103670-supplementary-material-SD1.pdf]

**SUPPLEMENTARY FIGURES**

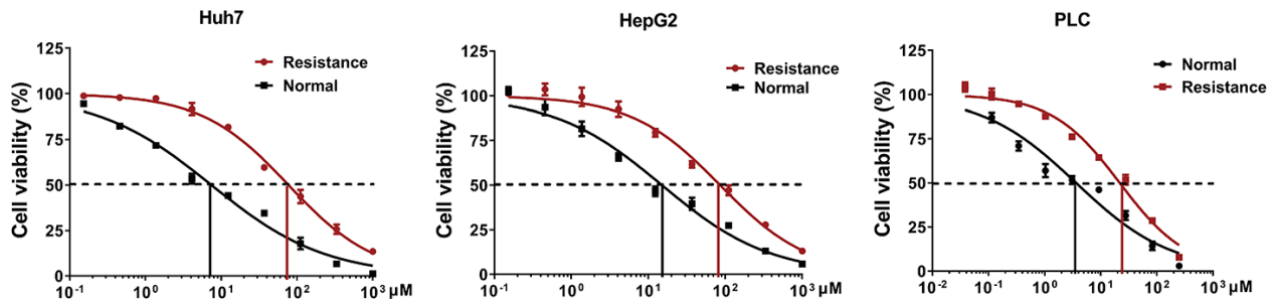

**Supplementary Figure 1. The effects of Sorafenib on the resistant or normal HCC cells.** MTT assays for cell proliferation inhibition test. Representative dose-response curves of sorafenib on Huh7/HepG2/PLC cells.

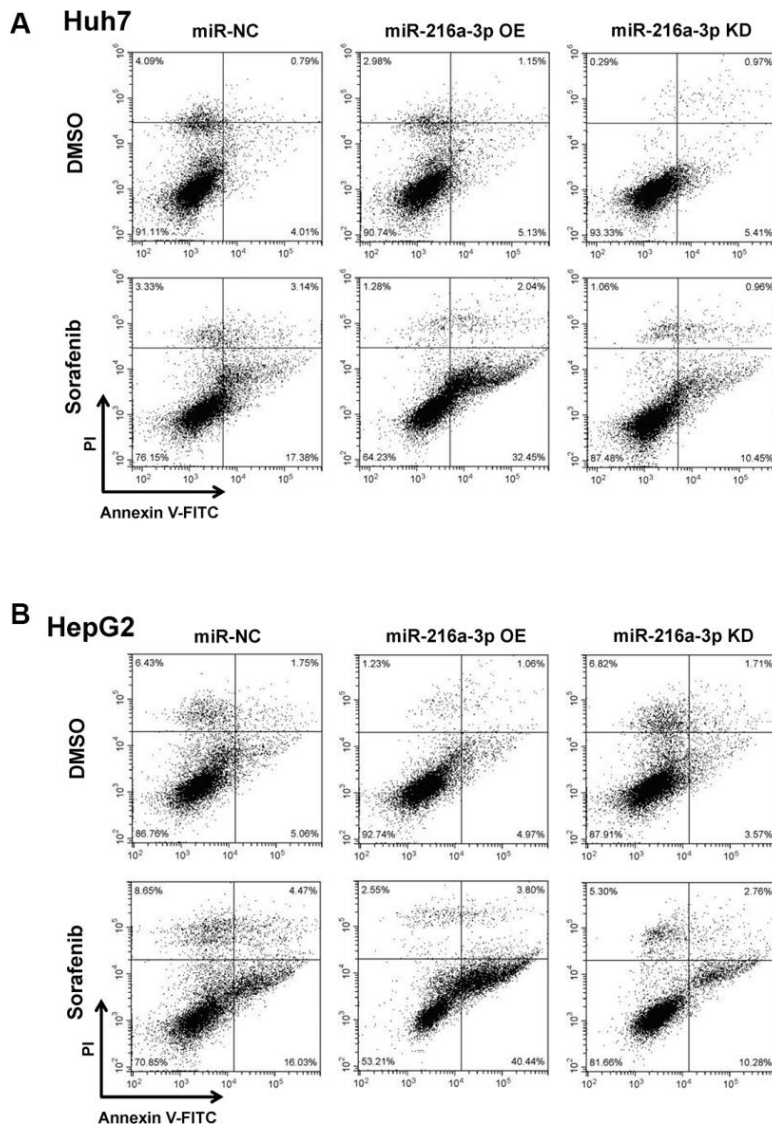

**Supplementary Figure 2.** Annexin V/PI double staining assays for apoptosis (representative charts of flow cytometric analysis) in DMSO or sorafenib-treated NC-, miR-216-3a OE-, and miR-216a-3p KD (A) Huh7 and (B) HepG2 cells with sorafenib treatment for 48h.
