# Supplementary material for: MicroRNA-216a-3p promotes sorafenib sensitivity in hepatocellular carcinoma by downregulating MAPK14 expression
Source: Aging (Albany NY). 2020 Sep 21;12(18):18192–208. doi: 10.18632/aging.103670 (PMC7585128; doi:10.18632/aging.103670)
Supplement: Supplementary Table 1 [file aging-12-103670-s001..xlsx]

## Sheet: TargetScan data for MAPK14-2
miRNA	Position in the UTR	seed match	context++ score	context++ score percentile	weighted context++ score	conserved branch length	Pct
Conserved sites
hsa-miR-216a-3p	32-39	8mer	-0.35	98	-0.35	6.678	0.9
hsa-miR-3681-3p	32-39	8mer	-0.34	98	-0.34	6.678	0.9
hsa-miR-128-3p	32-39	8mer	-0.31	98	-0.31	6.678	0.9
hsa-miR-27a-3p	33-39	7mer-m8	-0.1	81	-0.1	6.678	0.76
hsa-miR-27b-3p	33-39	7mer-m8	-0.1	81	-0.1	6.678	0.76
hsa-miR-4644	62-68	7mer-1A	-0.17	85	-0.17	4.068	N/A
hsa-miR-4306	62-68	7mer-1A	-0.17	85	-0.17	4.068	N/A
hsa-miR-185-5p	62-68	7mer-1A	-0.17	85	-0.17	4.068	N/A
hsa-miR-582-5p	588-595	8mer	-0.23	96	-0.22	2.363	N/A
hsa-miR-101-3p.2	589-595	7mer-1A	-0.13	90	-0.13	3.645	0.27
hsa-miR-124-3p.1	604-611	8mer	-0.5	99	-0.48	5.98	0.97
hsa-miR-506-3p	605-612	8mer	-0.3	94	-0.29	5.301	0.85
hsa-miR-124-3p.2	605-612	8mer	-0.36	94	-0.35	5.301	0.85
hsa-miR-24-3p	662-668	7mer-m8	-0.27	95	-0.26	3.663	0.49
hsa-miR-505-3p.2	1105-1112	8mer	-0.11	93	-0.11	2.234	N/A
hsa-miR-6835-3p	1130-1136	7mer-m8	-0.06	85	-0.05	2.826	N/A
hsa-miR-22-3p	1451-1457	7mer-m8	-0.43	98	-0.41	3.801	0.54
hsa-miR-340-5p	1590-1597	8mer	-0.09	96	-0.09	1.836	N/A
hsa-miR-125a-5p	1610-1616	7mer-m8	-0.26	93	-0.25	3.416	0.41
hsa-miR-125b-5p	1610-1616	7mer-m8	-0.22	90	-0.21	3.416	0.41
hsa-miR-4319	1610-1616	7mer-m8	-0.18	86	-0.16	3.416	0.41
hsa-miR-19a-3p	2057-2064	8mer	-0.18	81	-0.17	2.817	0.3
hsa-miR-19b-3p	2057-2064	8mer	-0.18	81	-0.17	2.817	0.3
hsa-miR-489-3p	2264-2270	7mer-m8	-0.22	97	-0.2	5.245	0.14
